# Supplementary material
Source: Springer Nature journal article supplement (https://www.springermedizin.de/resource/supplementary/12937_2007_160_MOESM7_ESM.pdf/25654526)

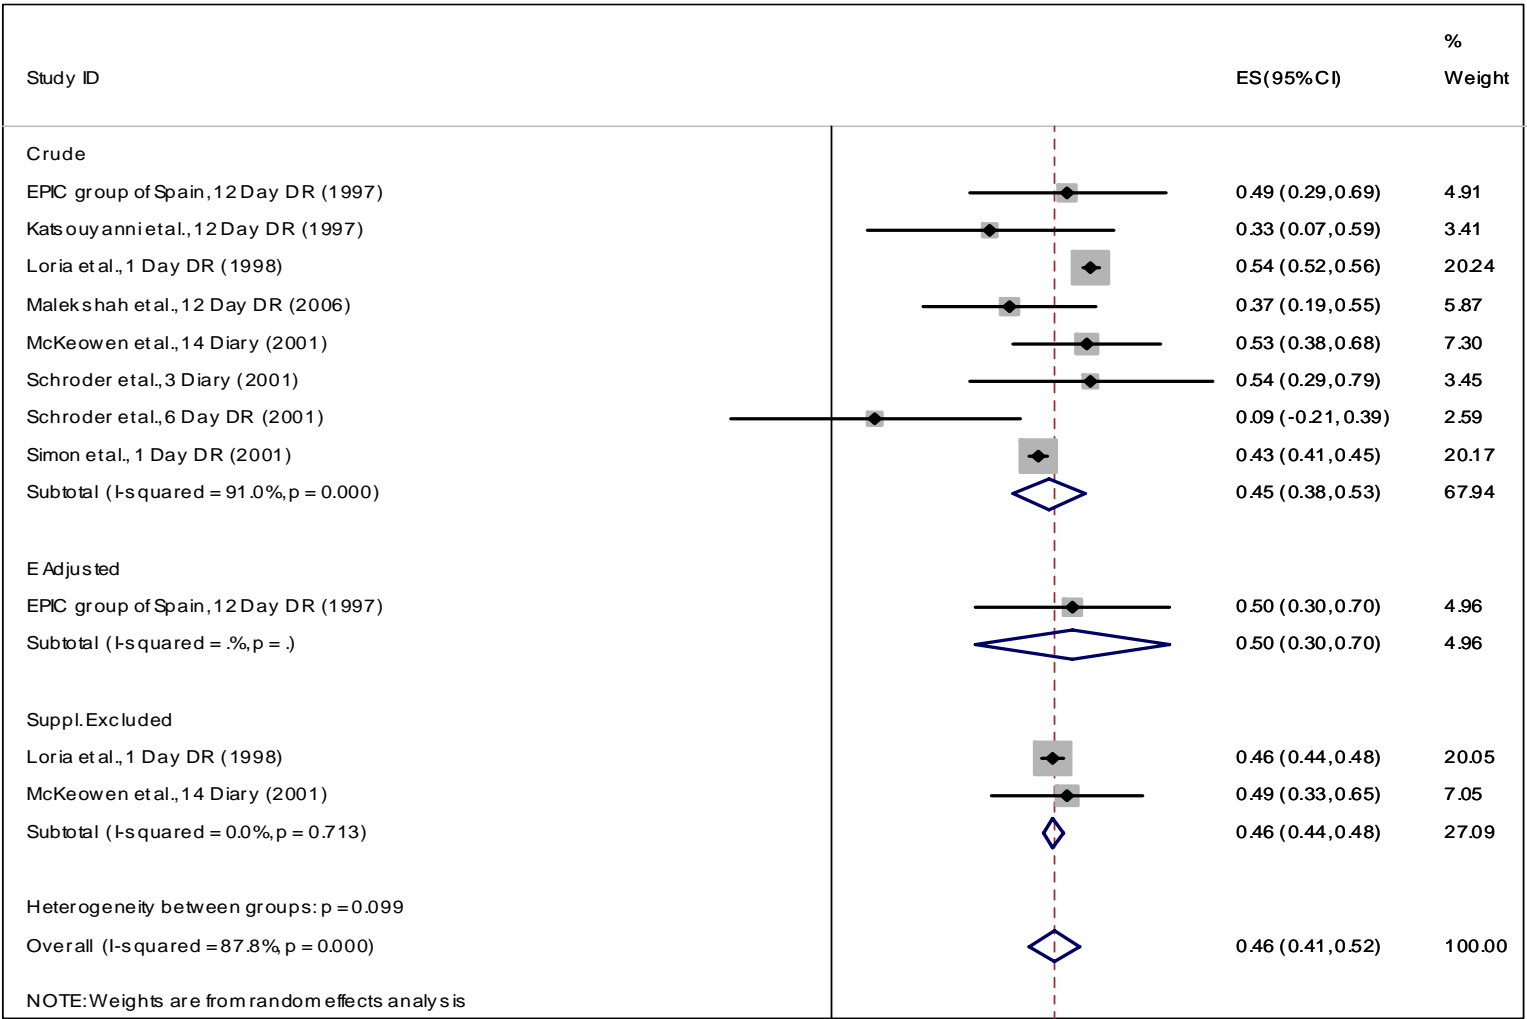

NOTE: Weights are from random effects analysis

Supplement: MOESM7 [file 25654526]
